# Supplementary material for: Differences in Patient Outcomes of Prevalence, Interval, and Screen-Detected Lung Cancers in the CT Arm of the National Lung Screening Trial
Source: PLOS journal article supplement (doi:10.1371/journal.pone.0159880), 2016-08-10

**S1 Fig. Schema for the Entire CT-arm of the NLST based on Screening Results and Lung Cancer Diagnoses.** The dashed lines indicate the parts of the schema that were not included in the final analyses

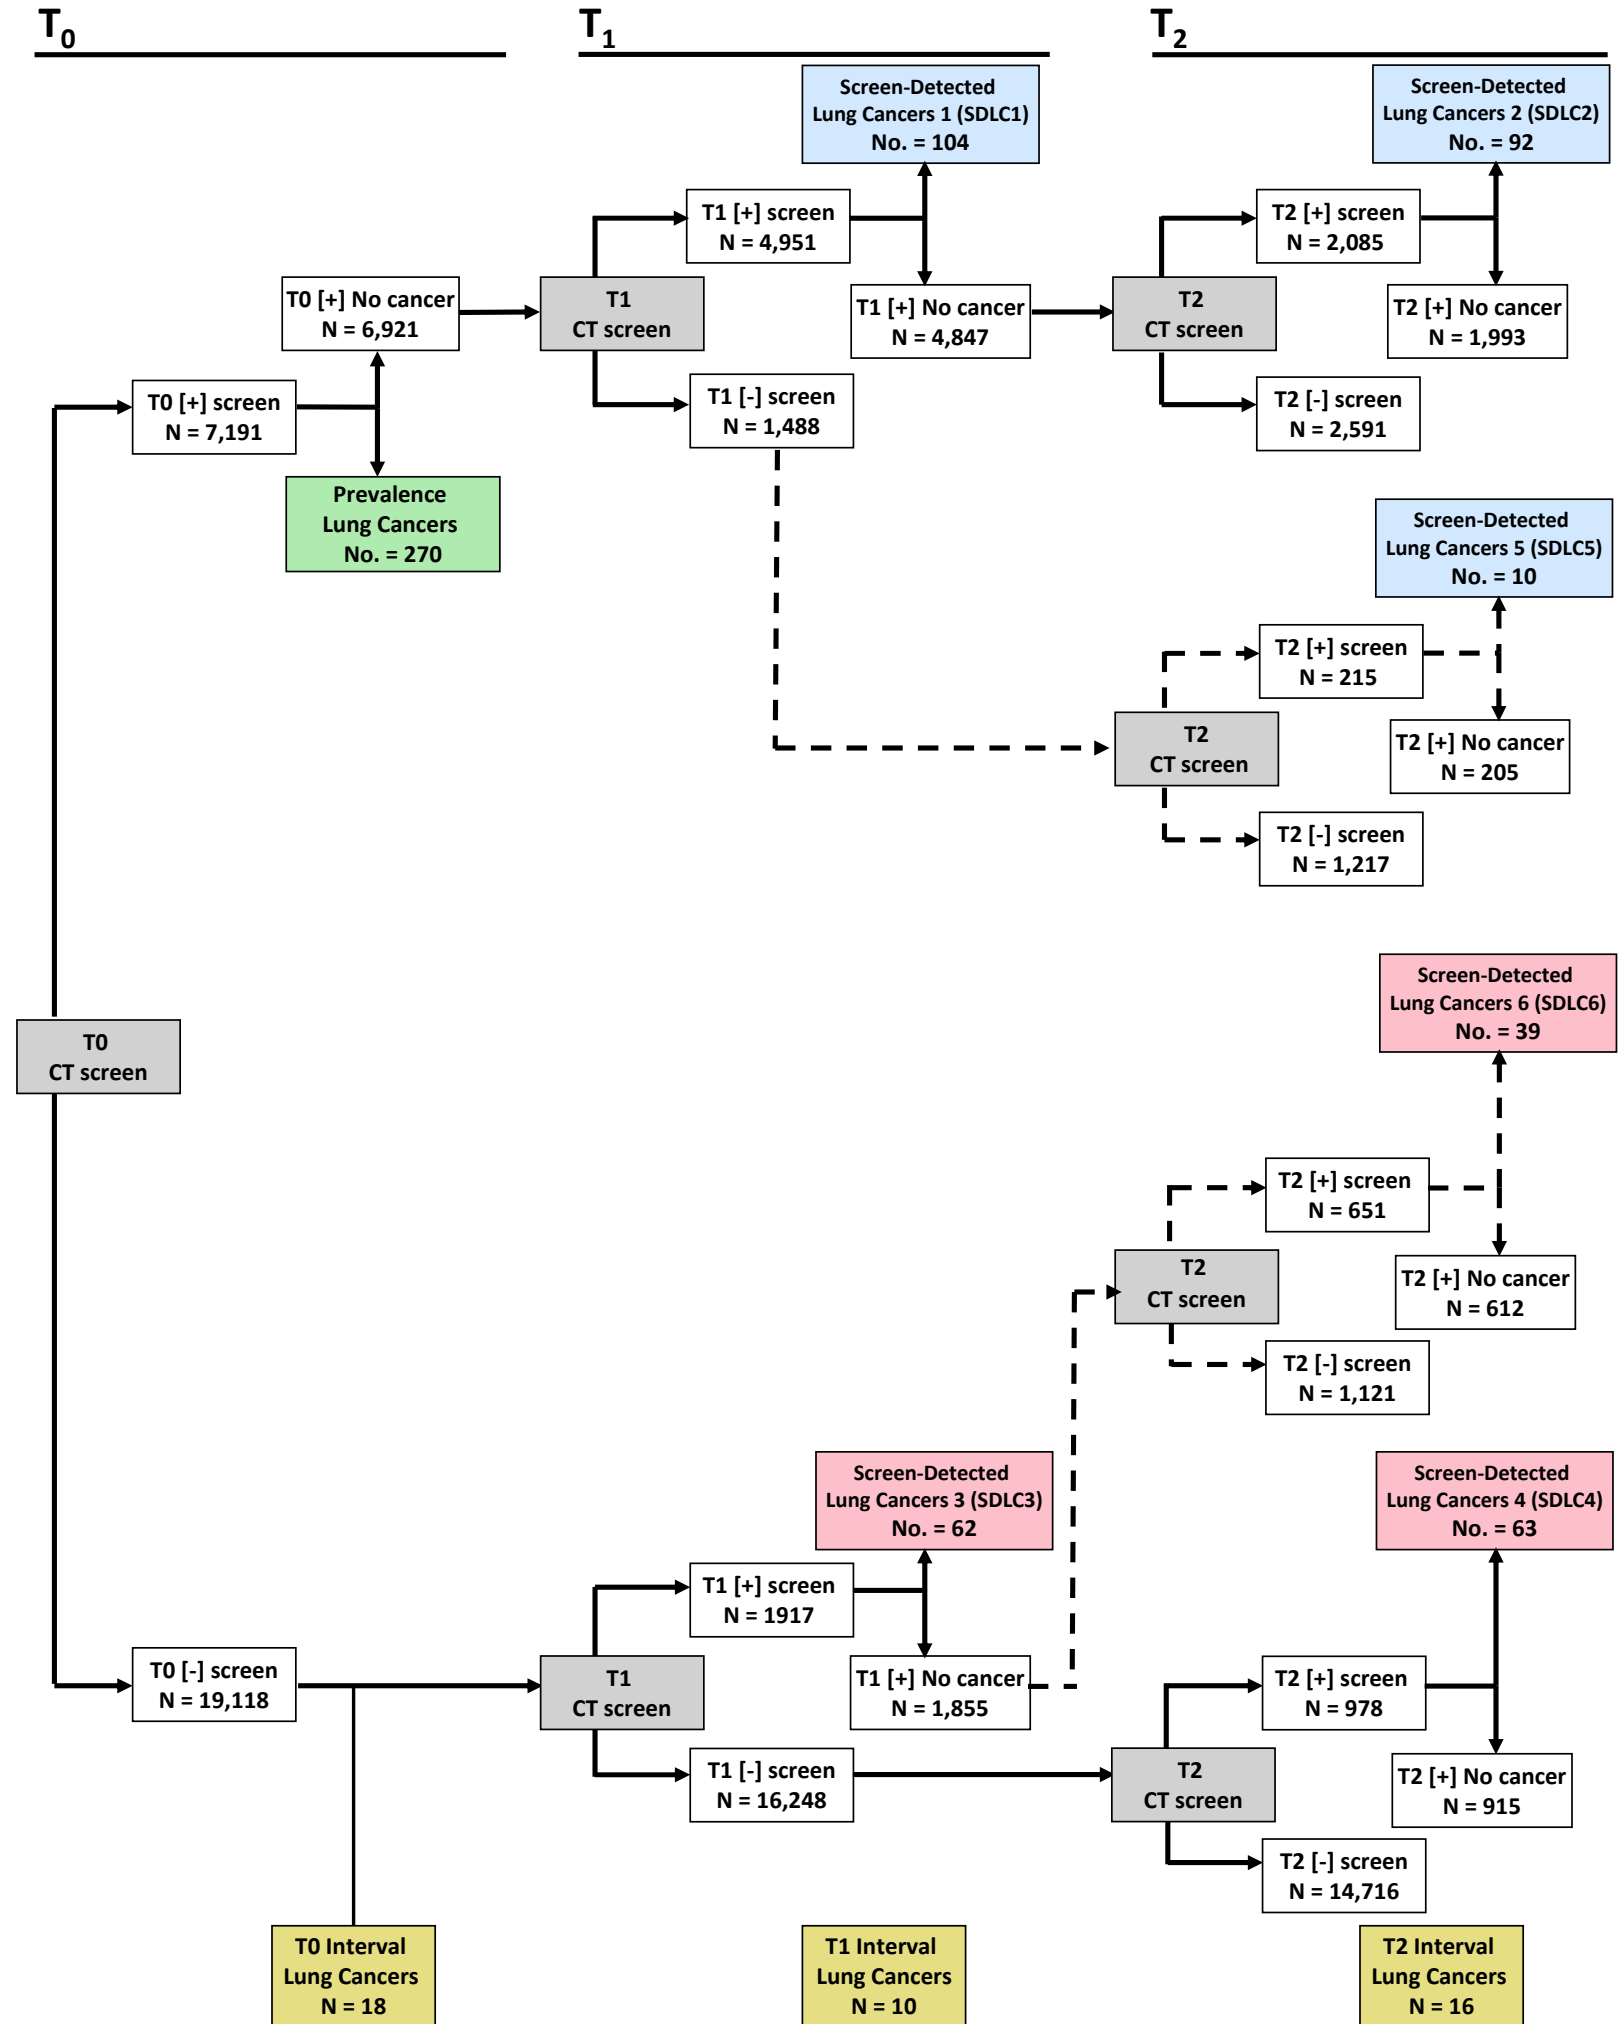

Supplement: S1 (10.1371/journal.pone.0159880.s001) [file journal.pone.0159880.s001]
